# Supplementary material
Source: PubMed Central journal article supplement (PMC4012340)
Supplement: NIHMS576299-supplement-01.pdf [file NIHMS576299-supplement-01.pdf]

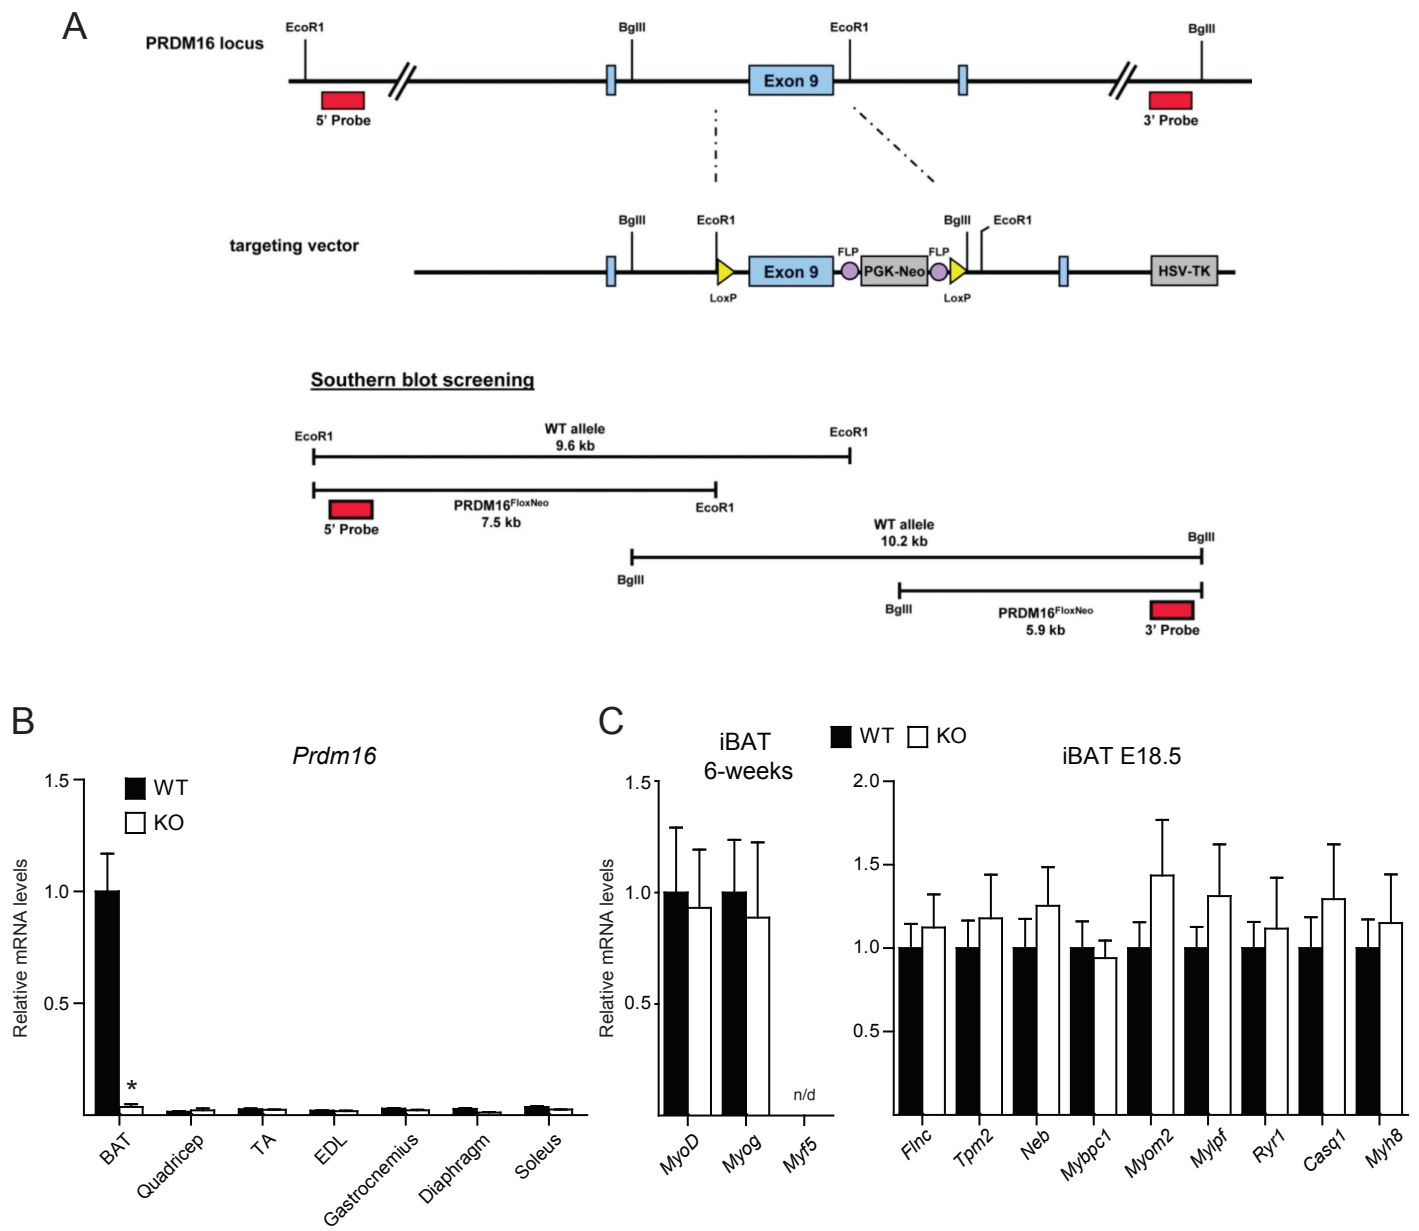

**Figure S1. *Prdm16* deficiency in BAT does not increase the expression of skeletal muscle genes (related to Figure 1)**

**(A)** Gene targeting strategy for creating *Prdm16*<sup>fllox</sup> mice.

**(B)** *Prdm16* mRNA levels in interscapular brown adipose tissue (iBAT) and several skeletal muscles (quadricep, tibialis anterior [TA], extensor digitorum longus [EDL], gastrocnemius, diaphragm and soleus) of wildtype (WT) and *Myf5*- $\Delta$ *Prdm16* (KO) mice.

**(C)** mRNA levels of skeletal muscle-selective genes from the iBAT of 6-week-old and E18.5 WT and KO mice. (B,C: mean  $\pm$  SEM, n=6-11, \*p<0.01).

A

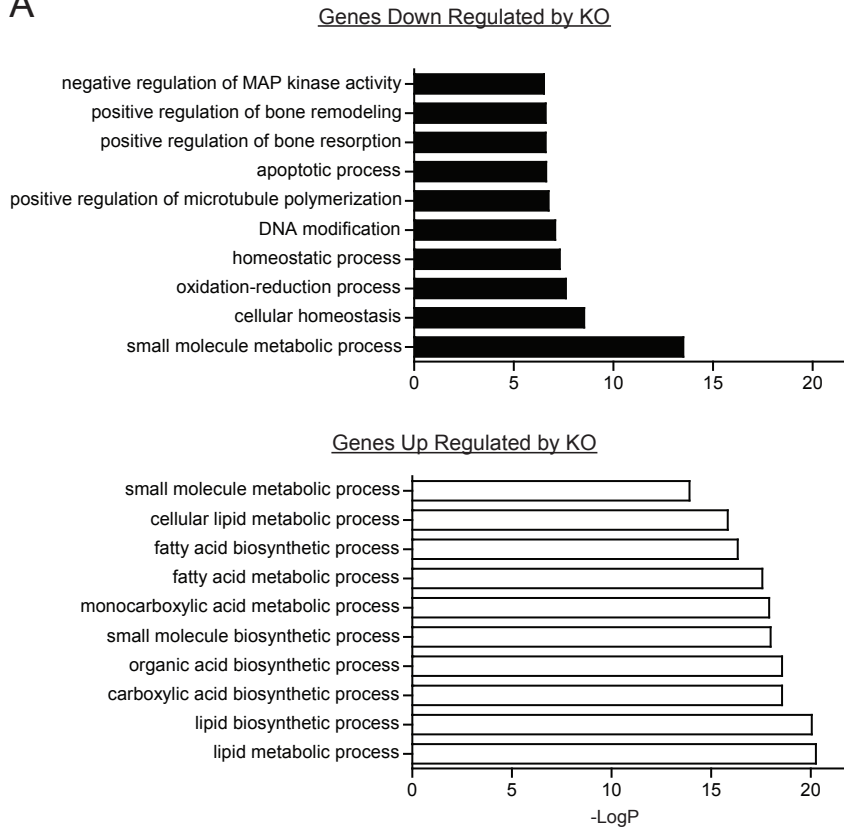

B

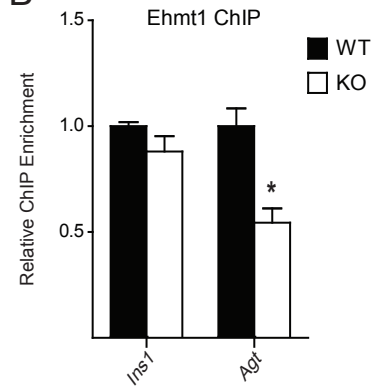

**Figure S2. Prdm16 deficient iBAT expresses a white fat-related gene profile (related to Figure 2)**

**(A)** Gene Ontology (GO) analysis of genes that are differentially expressed between wildtype (WT) and Prdm16-deficient interscapular BAT (KO) of 6-week-old mice.

**(B)** Relative ChIP enrichment for Ehmt1 at the *Ins1* (control) and *Agt* promoter in WT and KO iBAT. (mean  $\pm$  stdev, n=3, \*p<0.05).

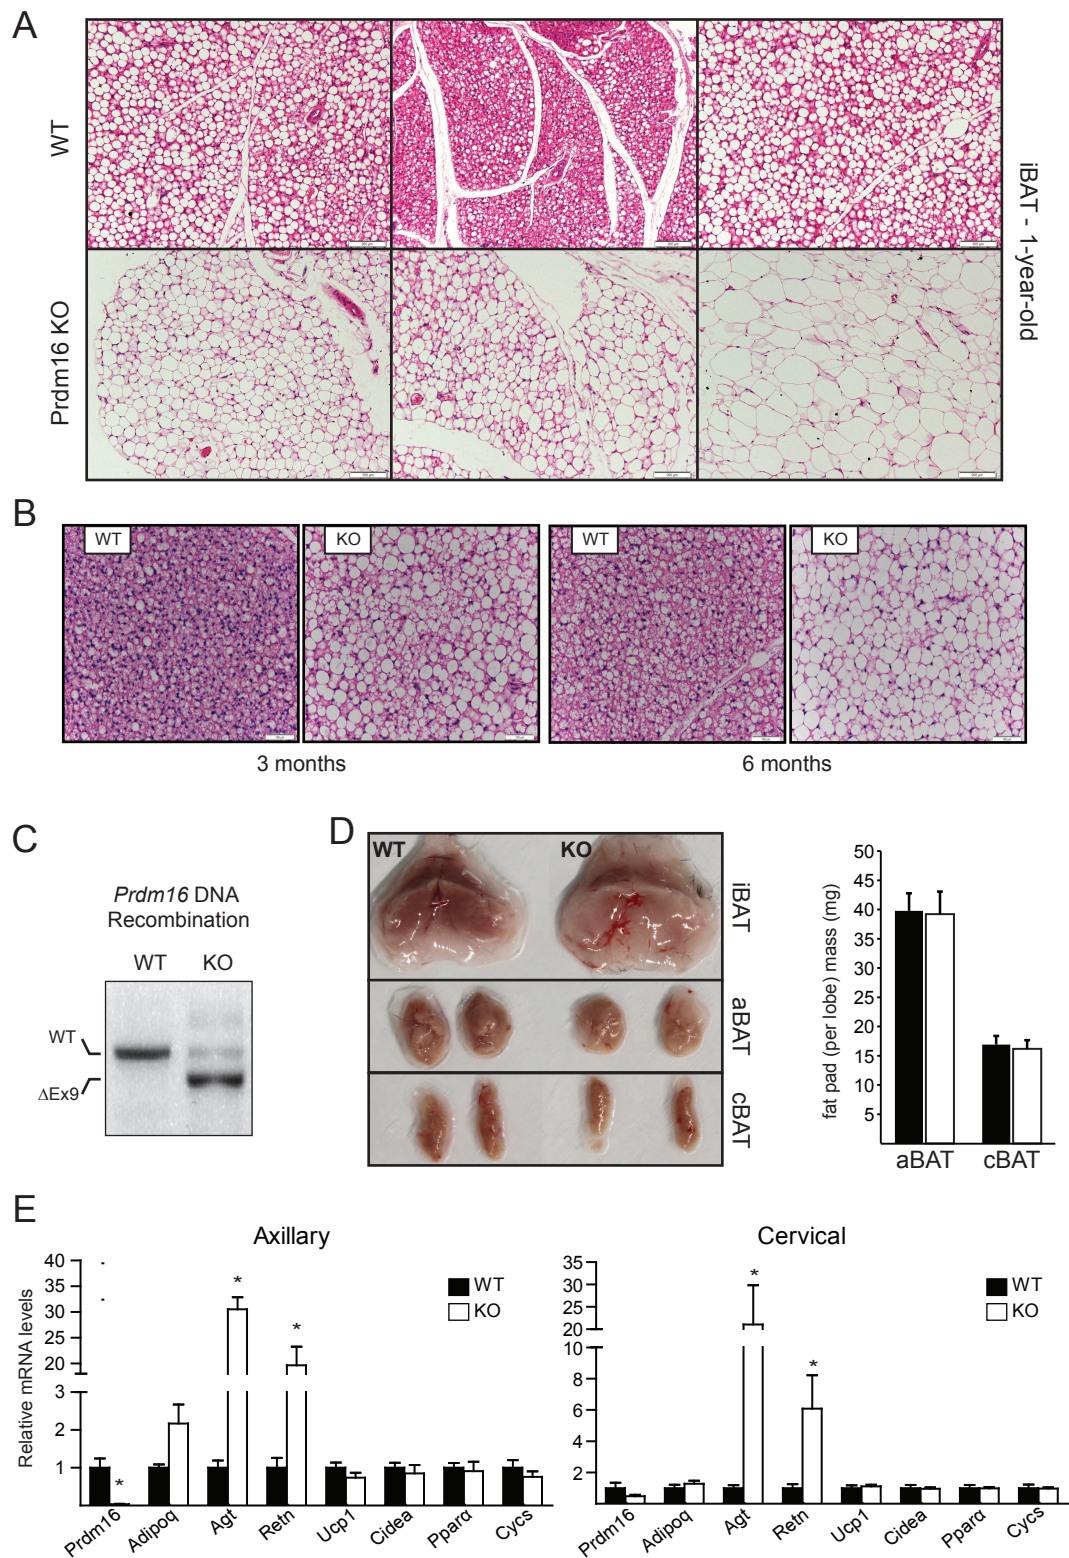

**Figure S3. *Prdm16*-deficiency causes a loss of interscapular brown adipose tissue identity in adult mice (related to Figure 3)**

**(A)** Hematoxylin and eosin (H&E) staining of sections from the interscapular brown adipose tissue (iBAT) of one-year-old WT and *Myf5-ΔPrdm16* (*Prdm16* KO) mice.

**(B)** H&E staining of WT and *Myf5-ΔPrdm16* (KO) iBAT from 3 and 6 month-old-mice.

**(C)** *Myf5*-Cre driven DNA recombination of the *Prdm16* locus in iBAT from 9-month-old WT and KO mice.

**(D)** Gross morphology and mass of dissected axillary and cervical BAT depots from WT and KO mice.

**(E)** mRNA levels of brown and white fat-related genes in the axillary and cervical BAT depots of 6-month-old WT and KO mice (mean ± stdev, n=4, \*p<0.05).

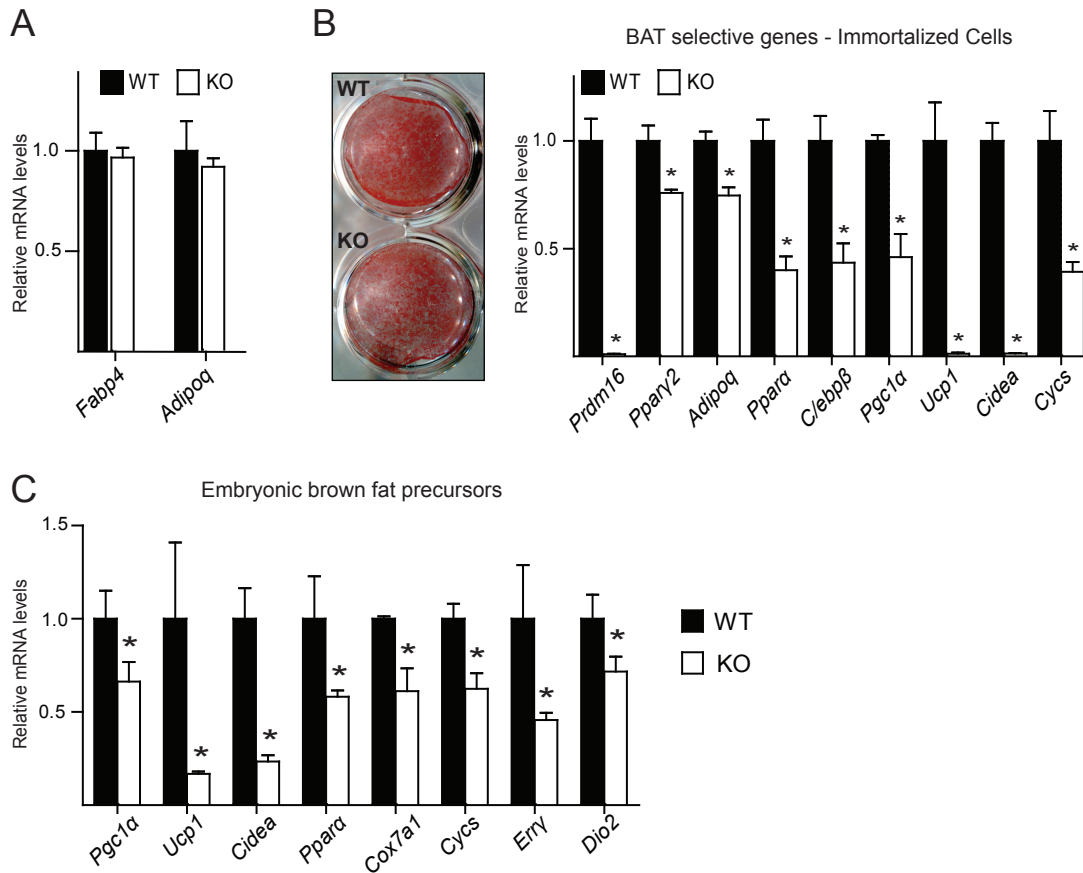

**Figure S4. Prdm16 is required for brown fat cell differentiation ex vivo (related to Figure 4)**

**(A)** *Fabp4* and *Adipoq* mRNA levels in adipocytes derived from newborn wildtyped (WT) and *Myf5- $\Delta$ Prdm16* (KO) brown adipocyte precursors.

**(B)** Adipocytes from immortalized WT and Prdm16 KO brown precursor cells. Oil-red-O staining (left); mRNA levels of brown fat-selective genes (mean  $\pm$  stdev, n=3) (right).

**(C)** Embryonic Pdgfra+ precursors from the body wall of E14.5 WT and KO embryos were induced to differentiate into adipocytes for 8 days followed by qPCR analysis of brown fat-selective gene levels (mean  $\pm$  SEM, n=3, \*p<0.05).

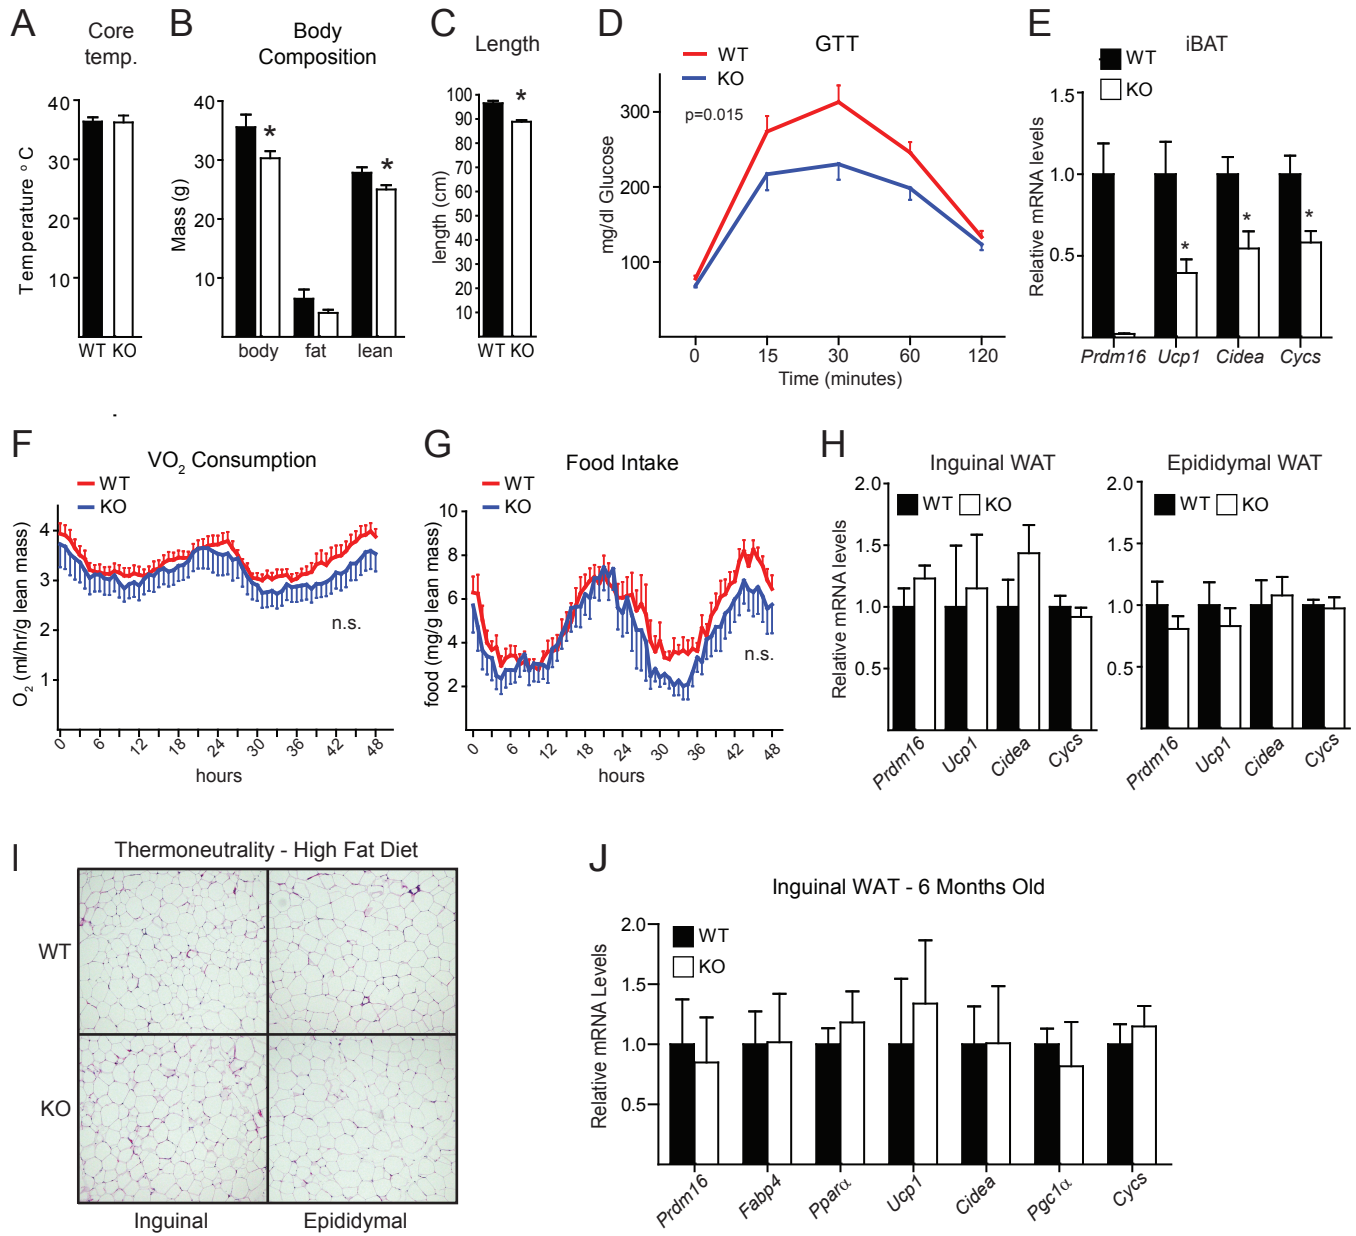

**Figure S5. *Myf5-ΔPrdm16* mice are not prone to weight gain and do not display increased browning of white fat (related to Figure 5)**

**(A)** Core body temperatures of 3-month-old WT and *Myf5-ΔPrdm16* (KO) mice, n=4.

**(B,C)** Body composition (B) and length (C) of 11-month-old WT and KO mice, n=10.

**(D)** Glucose tolerance test in 11-month-old chow-fed WT and KO mice, n=10.

**(E)** mRNA levels of brown fat-selective genes in interscapular BAT (iBAT) of 3-month-old WT and KO mice that were maintained at thermoneutrality and fed a high-fat diet, n=8.

**(F,G)** Oxygen consumption (F) and food intake (G) over 48 hours in individually housed 11-month-old WT and KO mice housed at 22°C. Normalized to lean body mass.

**(H)** mRNA levels of brown fat-selective genes in inguinal and epididymal white adipose tissue (WAT) from 6-month-old WT and KO mice housed under standard conditions, n=4.

**(I,J)** Hematoxylin and eosin staining (I) and mRNA expression levels of brown fat-selective genes (J) in inguinal and epididymal WAT from 3-month-old mice maintained at thermoneutrality and fed a high-fat diet for 9 weeks, n=8.

All values are mean ± SEM; \*p < 0.05.

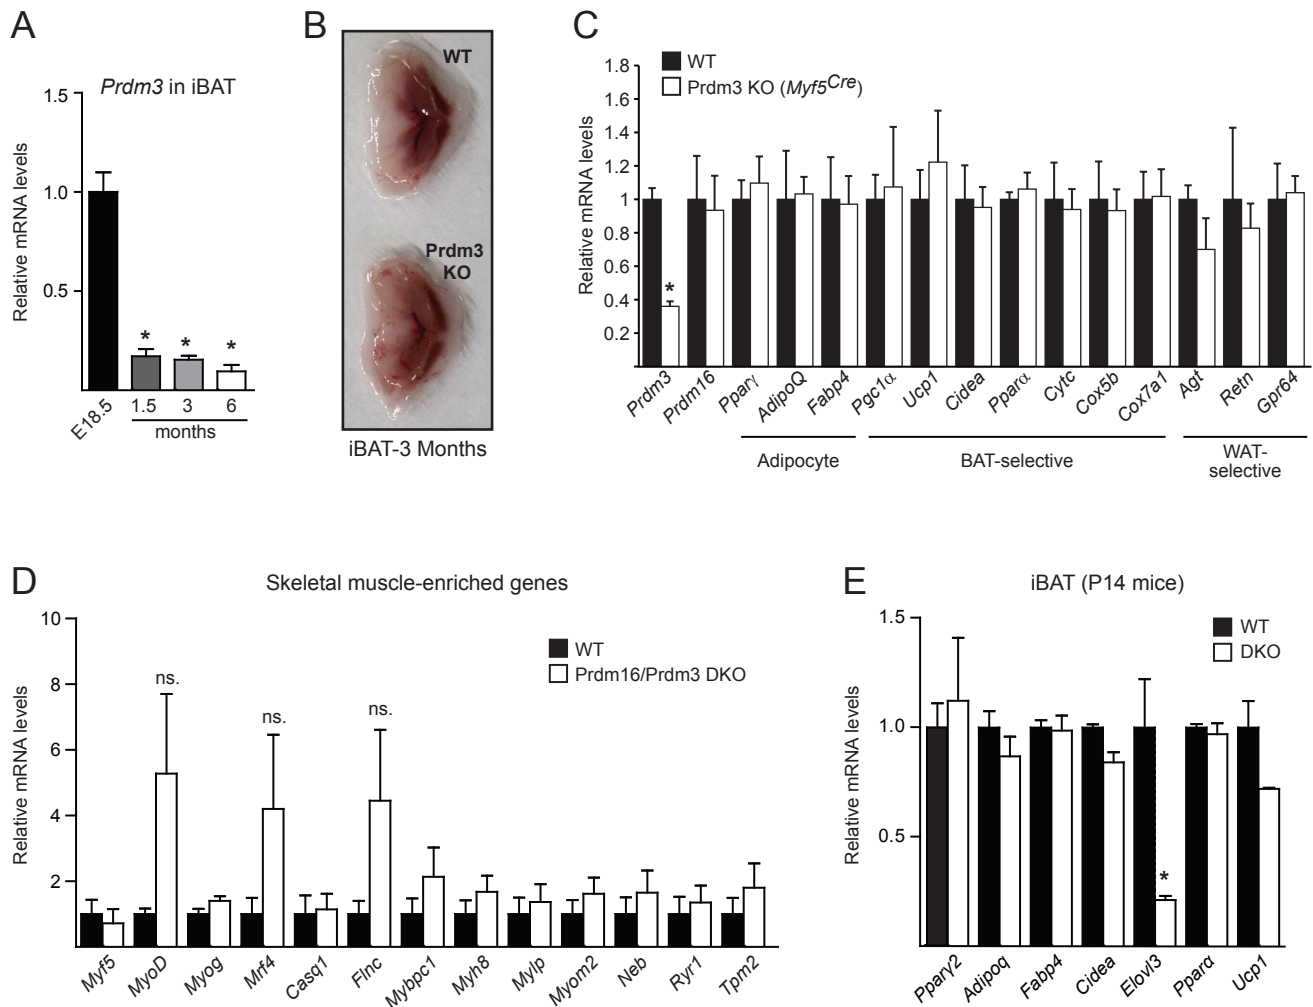

**Figure S6. Prdm16 or Prdm3 are required for the postnatal maintenance of brown fat fate (related to Figure 6)**

(A) *Prdm3* mRNA levels in interscapular brown adipose tissue (iBAT) of E18.5 embryos (n=5) and 1.5 to 6 month-old mice (as indicated (n=4/group)).

(B) iBAT depots from WT and Prdm3 Knockout (KO) (*Myf5<sup>Cre</sup>*) mice

(C) mRNA levels of *Prdm3*, *Prdm16* and various adipocyte, BAT-selective and WAT-selective markers in the iBAT of 3-month-old WT (n=3) and Prdm3 KO animals (n=4).

(D) mRNA levels of skeletal muscle-selective genes in iBAT of 3-month-old WT (n=7) and *Myf5-ΔPrdm16/Prdm3* (DKO, n=5) mice.

(E) mRNA levels of adipocyte and BAT-selective genes in iBAT of p14 (2-week-old) WT (n=7) and DKO (n=4) mice.

All mRNA expression values are mean  $\pm$  SEM, \*p < 0.05.

**Table S1 Primers used for real-time PCR and ChIP-PCR analysis**

| mRNA            | Fwd                       | Rev                       |
|-----------------|---------------------------|---------------------------|
| <i>Adipoq</i>   | GCACTGGCAAGTTCTACTGCAA    | GTAGGTGAAGAGAACGGCCTTGT   |
| <i>Agt</i>      | AAGACCCATGCATGATCAGCTC    | CTTCCTGCCTCATTACAGCATC    |
| <i>Casq1</i>    | ATGAGGTGCTGGCCCTCCTCT     | GAGTCCACCAGGCCAAAGCCA     |
| <i>Cidea</i>    | TGCTCTTCTGTATCGCCAGT      | GCCGTGTTAAGGAATCTGCTG     |
| <i>Cideb</i>    | ATGGTGCTTGAGCAGGGCCAG     | ATCGAAGGTGATCGGGGCGAT     |
| <i>Clistn3</i>  | AGCCGTGAGGTGATCGAGTGC     | CCTCCAGGGTGAGCAGGGAT      |
| <i>Cox5b</i>    | GCTGCATCTGTGAAGAGGACAAC   | CAGCTTGAATGGGTTCCACAGT    |
| <i>Cox7a1</i>   | CAGCGTCATGGTCAGTCTGT      | AGAAAACCGTGTGGCAGAGA      |
| <i>Cycs</i>     | GCAAGCATAAGACTGGACAAA     | TTGTTGGCATCTGTGAAGAGAATC  |
| <i>Cyp2b10</i>  | TGCCCCCTTTGGGGAACCTCT     | CACAGGCCCTTGGTCCCAGGTG    |
| <i>Dgat1</i>    | CGGGACAAGACGGGCGGAC       | AGGATCAGCATCACACACACCA    |
| <i>Dio2</i>     | CAGTGTGGTGCACGTCTCCAATC   | TGAACCAAAGTTGACCACCAG     |
| <i>Errg</i>     | TGGCTACCGAGAGTTGGTGG      | AGCGATCGGTACACAACGCCG     |
| <i>Fabp4</i>    | ACACCGAGATTTCCCTCAAACCTG  | CCATCTAGGGTTATGATGCTCTTCA |
| <i>Finc</i>     | ATGCCAGAGAGGCCATGCAGC     | CGGGTTTGAGCTTGGCCTTGG     |
| <i>Fos1</i>     | GAGACGCGAGCGGAACAA        | CTTCCAGCACCAGCTCAAGG      |
| <i>Fos2</i>     | AGCCTCCCAGAGAGGACAG       | AGGACATTGGGGTAGGTGAAG     |
| <i>Gpr64</i>    | CCACACCAGCCCCATCTGTCC     | TCCATCTGGGATACTTGGGCTTCC  |
| <i>Hsph1</i>    | ACGGACCTGCCGCTGAACATC     | TGCAGGAGCTCAGCACACAGT     |
| <i>Krt19</i>    | ACCATCGAGGACTTGCAGCAGC    | GCTCAGACGCAAGGCGTGTTC     |
| <i>Limk1</i>    | GACCTGGGTGCTCCGAATCC      | CCTTGCCAGCACTTCCCAT       |
| <i>Mybpc1</i>   | CGCAGGGAATTATAGGTGTGAGGTC | CCTGCATCCTTTGACCTTCTCCA   |
| <i>Myf5</i>     | CAGCCCCACCTCCAACCTG       | GGGACCAGACAGGGCTGTTA      |
| <i>Myh8</i>     | CTCCATGAGCCCGGAGTGCTG     | CGGCAGCCACTTGTAGGGGTT     |
| <i>Mylpf</i>    | GAGAAGGGCAGGAGCGGAAGG     | TGGCTGCAAAGGTGTCCCGAA     |
| <i>Myod</i>     | CGCCACTCCGGGACATAG        | GAAGTCGTCTGCTGTCTCAAAGG   |
| <i>Myogenin</i> | AGCGCAGGCTCAAGAAAGTGAATG  | CTGTAGGGCGTCAATGTACTGGAT  |
| <i>Myom2</i>    | CGGTCACAGGCTCGGGACAAG     | GGGCCCTGCTCATTCCGGTCTT    |
| <i>Neb</i>      | AGGCAAAGGCTTCTTCCCCCA     | GGGCTTGACCAGGACAGGAG      |
| <i>Nnmt</i>     | GGAGCCTTTGACTGGTCCCCA     | CCTGCTTGATTGCACGCCCTCA    |
| <i>Pck1</i>     | TGGCCATGATGAACCCAGCC      | GAGGTGCCAGGAGCAACTCCA     |
| <i>Pgc-1a</i>   | CCCTGCCATTGTTAAGACC       | TGCTGCTGTTCTGTTTTT        |
| <i>Ppara</i>    | GCGTACGGCAATGGCTTTAT      | GAACGGCTTCCCTCAGGTTCTT    |
| <i>Pparg1</i>   | TGAAAGAAGCGGTGAACCACTG    | TGGCATCTCGTGTCAACCATG     |
| <i>Pparg2</i>   | TGGCATCTCTGTGTCAACCATG    | GCATGGTGCCTTCGCTGA        |
| <i>Prdm3</i>    | AACAAAACCTGGAGAGTGAGAG    | AATGCCTTGGGACACTGATC      |
| <i>Prdm16</i>   | CAGCAGGTTGAAGCCATT        | GCGTGCATCCGCTTGTG         |
| <i>Retn</i>     | CTGTCCAGTCTATCCTTGCACAC   | CAGAAGGCACAGCAGTCTTGA     |
| <i>Ryr1</i>     | GCACTCATGCCCGCTCCCTAT     | GGCCTTGGTCCCTCAGTGAGCC    |
| <i>Sgk2</i>     | GGTGGTGTAGGGGCGAGTCC      | GAGGTACAGGCAGCCACTGT      |
| <i>Tbp</i>      | GAAGCTGCGGTACAATCCAG      | CCCCTTGTACCCTTACCAAT      |
| <i>Thbd</i>     | CAGGGGCCCAATCCATGTCCC     | CGGATCCAGAAGCTCCACGCA     |
| <i>Tpm2</i>     | GGGGACAGAGGACGAGGTGGA     | GGCGGTTCCAGAGAGGCCACAT    |
| <i>Trif2</i>    | GAGCGACCTCCAGGCCATGTT     | TGGCGGAGAGCTTATCGAGG      |
| <i>Trim14</i>   | TTGGAAGACGCCGGGAAAGG      | GGCCAGTACTTCTTTCATCCAGG   |
| <i>Tubb2a</i>   | GTGAGGTGCGGACCATTCGGC     | GACAGAGTCCACCAGCTCGGC     |
| <i>Ucp1</i>     | ACTGCCACCTCCAGTCATT       | CTTTGCCTCACTCAGGATTGG     |
| <i>Uqdh</i>     | GCCGATGTGGAAGAGGTGGCA     | CGGGCAGATTGAGGCCTCACA     |
| <b>ChIP</b>     |                           |                           |
| Ins             | GGACCCACAAGTGAACAAC       | GTGCAGCACTGATCCACAAT      |
| Retn -2kb       | AGCACAAAGGTGGGGGATGGT     | AACCACAGAACAGGAGGCCAT     |
| Retn -1.5kb     | TGGACAGAGGGGTGTCAGGGG     | GCAATTGCTGGAGACCTGAGGTGA  |
| Retn -1kb       | CAGGAGTTCAAGGTGCTTCTTGGC  | GCTGTTAACTGGCCTCGATGT     |
| Retn -0.5kb     | CTCTTGCTTAGCCCCACCCCC     | ACCACACCACCAGACCCTCAC     |
| Retn P.         | AGACAACGTCCTGAGAAGACAATC  | CCATCTGCCTTGGATAATAAGTA   |
| Retn 0.5kb      | GGAACAGACCCGCCCAGCTAC     | GGGGCCTTTTGGAGTGAGGGG     |
| Retn 1.0kb      | ATGGGTGCCCTACACCATGC      | GCAGGGGGCGATCTTTGGGT      |
| Retn 1.5kb      | CATCTCTGCCTCCCACCTGCC     | GCGGGCTGCTGTCCAGTCTAT     |
| Retn 2kb        | TGGACCTTGGCAGGACTGAGGT    | ATCCTCTGCCCCAGGTGGTGT     |
| Agt P.          | CTTGGTCAAGCCTGGATTCTC     | CCAACCTAGACAAGCACAGCTATC  |
| <b>Mito DNA</b> |                           |                           |
| <i>Ndufv1</i>   | CTTCCCCACTGGCCTCAAG       | CCAAAACCCAGTGATCCAGC      |
| <i>MT-CO1</i>   | TGCTAGCCGCAGGCATTAC       | GGGTGCCCAAAGAAATCAGAAC    |
